# Supplementary material for: Cognitive specialization for learning faces is associated with shifts in the brain transcriptome of a social wasp
Source: Oxford University Press journal article supplement (doi:10.1242/jeb.155200), 2017-06-14
Supplement: jeb155200supp.pdf [file jeb155200supp.pdf]

**Table S1**

[Click here to Download Table S1](#)

**Table S2**

[Click here to Download Table S2](#)

Table S3. Individual recognition candidate genes from Berens et al. (2016) with corresponding mean log<sub>2</sub> fold changes during face training from this study (negative fold change (green): higher expression during facial learning, positive fold change (red): higher expression during pattern learning). Four genes (*IP3K*, *IP3R*, *Nckx30C*, and *Su(var)2-10*) are candidates for individual memory recall, and all showed down-regulation during memory recall (red) compared to no social interaction and initial memory formation. None of these genes were differentially expressed between face specialization vs. face learning in either paper wasp species (*P. fuscatus* or *P. metricus*), except *Nckx30C* (indicated by \*) which was up-regulated in face learning compared to pattern learning for *P. metricus*. For most genes, there were multiple transcripts with Blast hits [E-value < 1e-4] to the gene sequences, so the log<sub>2</sub> fold changes were averaged across all transcripts. *mGluR* was not found in the *P. metricus* transcriptome.

| Gene               | <i>P. fuscatus</i>                 |                                                       | <i>P. metricus</i>                 |                                                 |
|--------------------|------------------------------------|-------------------------------------------------------|------------------------------------|-------------------------------------------------|
|                    | Individual Memory Recall Candidate | Face Specialization Mean log <sub>2</sub> Fold Change | Individual Memory Recall Candidate | Face Learning Mean log <sub>2</sub> Fold Change |
| <i>Ace</i>         |                                    | -0.226                                                |                                    | 0.332                                           |
| <i>Bap60</i>       |                                    | 0.165                                                 |                                    | 0.101                                           |
| <i>Cha</i>         |                                    | -0.335                                                |                                    | 0.348                                           |
| <i>dor</i>         |                                    | 0.064                                                 |                                    | -0.064                                          |
| <i>e</i>           |                                    | 0.016                                                 |                                    | 0.312                                           |
| <i>gogo</i>        |                                    | -0.213                                                |                                    | 0.097                                           |
| <i>Gug</i>         |                                    | 0.130                                                 |                                    | 0.039                                           |
| <i>IP3K</i>        | Down regulated                     | -0.018                                                | Down regulated                     | 0.475                                           |
| <i>IP3R</i>        | Down regulated                     | -0.333                                                | Down regulated                     | 0.290                                           |
| <i>mGluR</i>       |                                    | -0.011                                                |                                    | N/A                                             |
| <i>N</i>           |                                    | -0.104                                                |                                    | 0.212                                           |
| <i>Nckx30C</i>     | Down regulated                     | 0.035                                                 |                                    | 0.602*                                          |
| <i>Nmdar1</i>      |                                    | 0.275                                                 |                                    | 0.411                                           |
| <i>PsGEF</i>       |                                    | -0.194                                                |                                    | 0.259                                           |
| <i>sca</i>         |                                    | 0.435                                                 |                                    | 0.069                                           |
| <i>Stau</i>        |                                    | -0.378                                                |                                    | 0.145                                           |
| <i>Su(var)2-10</i> | Down regulated                     | 0.117                                                 |                                    | 0.019                                           |
| <i>Syt7</i>        |                                    | -0.510                                                |                                    |                                                 |
